# Supplementary material for: Straightforward preparation of highly loaded MWCNT–polyamine hybrids and their application in catalysis
Source: Royal Society of Chemistry journal article supplement (doi:10.1039/d0na00291g), 2020-01-01
Supplement: d0na00291g1.pdf [file d0na00291g1.pdf]

## Supporting Information

### **Straightforward Preparation of Highly Loaded MWCNT-Polyamine Hybrids and their Application in Catalysis**

Vincenzo Campisciano,<sup>a</sup> Rene Burger,<sup>a,b</sup> Carla Calabrese,<sup>a</sup> Leonarda Francesca Liotta,<sup>c</sup> Paolo Lo Meo,<sup>a</sup> Michelangelo Gruttadauria<sup>\*a</sup> and Francesco Giacalone<sup>\*a</sup>

a Department of Biological, Chemical and Pharmaceutical Sciences and Technologies, University of Palermo, Viale delle Scienze, Ed. 17, 90128 Palermo, Italy. E-mail: [michelangelo.gruttadauria@unipa.it](mailto:michelangelo.gruttadauria@unipa.it) ; [francesco.giacalone@unipa.it](mailto:francesco.giacalone@unipa.it)

b Department of Natural Sciences, Bonn-Rhein-Sieg University of Applied Sciences, von-Liebig-Strasse 20, D-53359 Rheinbach, Germany.

c Istituto per lo Studio dei Materiali Nanostrutturati ISMN-CNR, via Ugo La Malfa, 153, 90146 Palermo (Italy).

### **Table of Contents:**

|                                                                   |           |
|-------------------------------------------------------------------|-----------|
| TEM images of <b>Imi-But-MWCNT</b> and <b>NH-But-MWCNT</b>        | <b>S2</b> |
| <sup>1</sup> H NMR spectra of products reported in <b>Table 2</b> | <b>S3</b> |
| <sup>1</sup> H NMR spectra of products reported in <b>Table 3</b> | <b>S8</b> |
| <sup>1</sup> H NMR spectra of product reported in <b>Table 4</b>  | <b>S9</b> |
| <sup>1</sup> H NMR spectra of products reported in <b>Table 5</b> | <b>S9</b> |

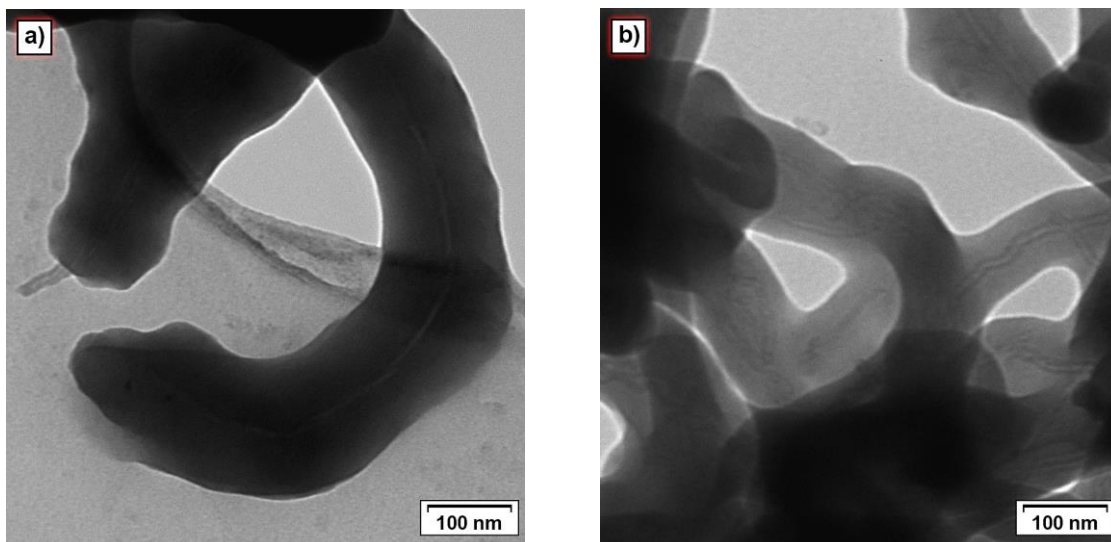

**Figure S1.** TEM images of a) **Imi-But-MWCNT** and b) **NH-But-MWCNT**.

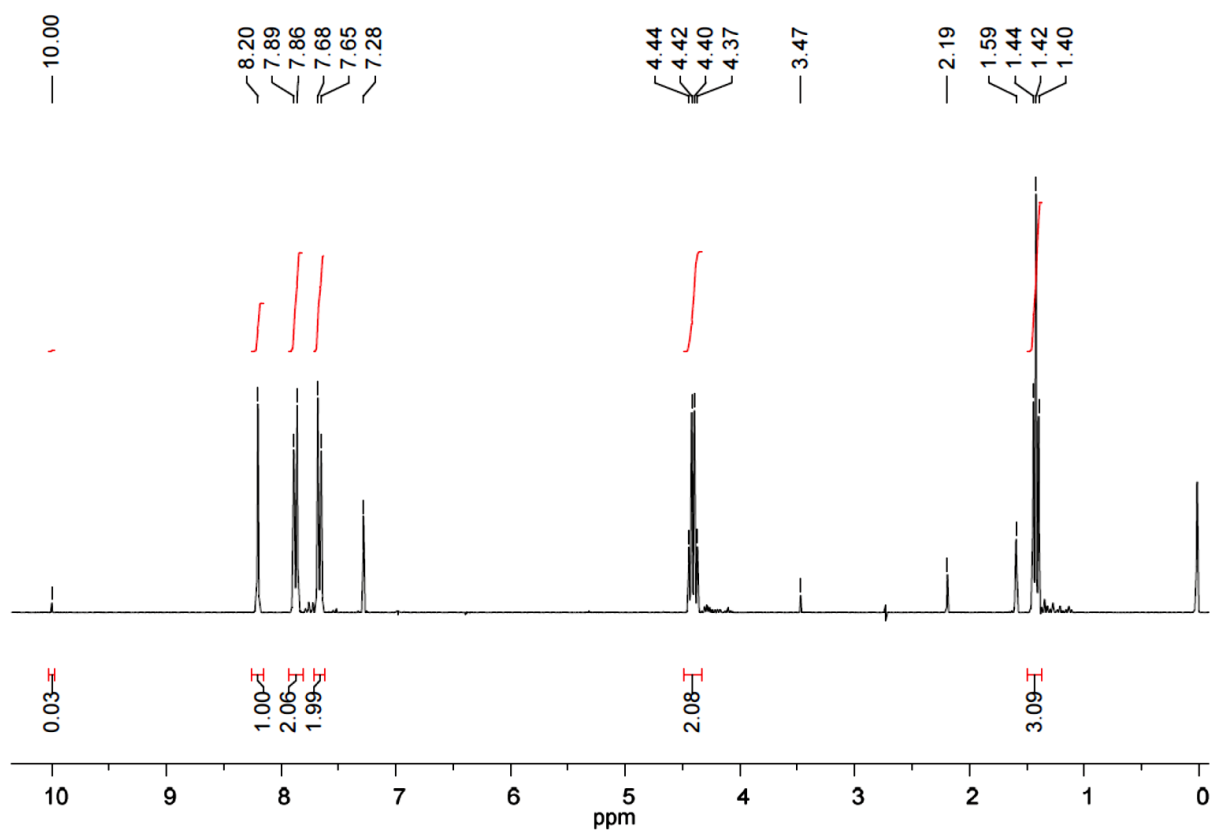

$^1\text{H}$  NMR (300 MHz,  $\text{CDCl}_3$ ) Table 2, Entry 1b.

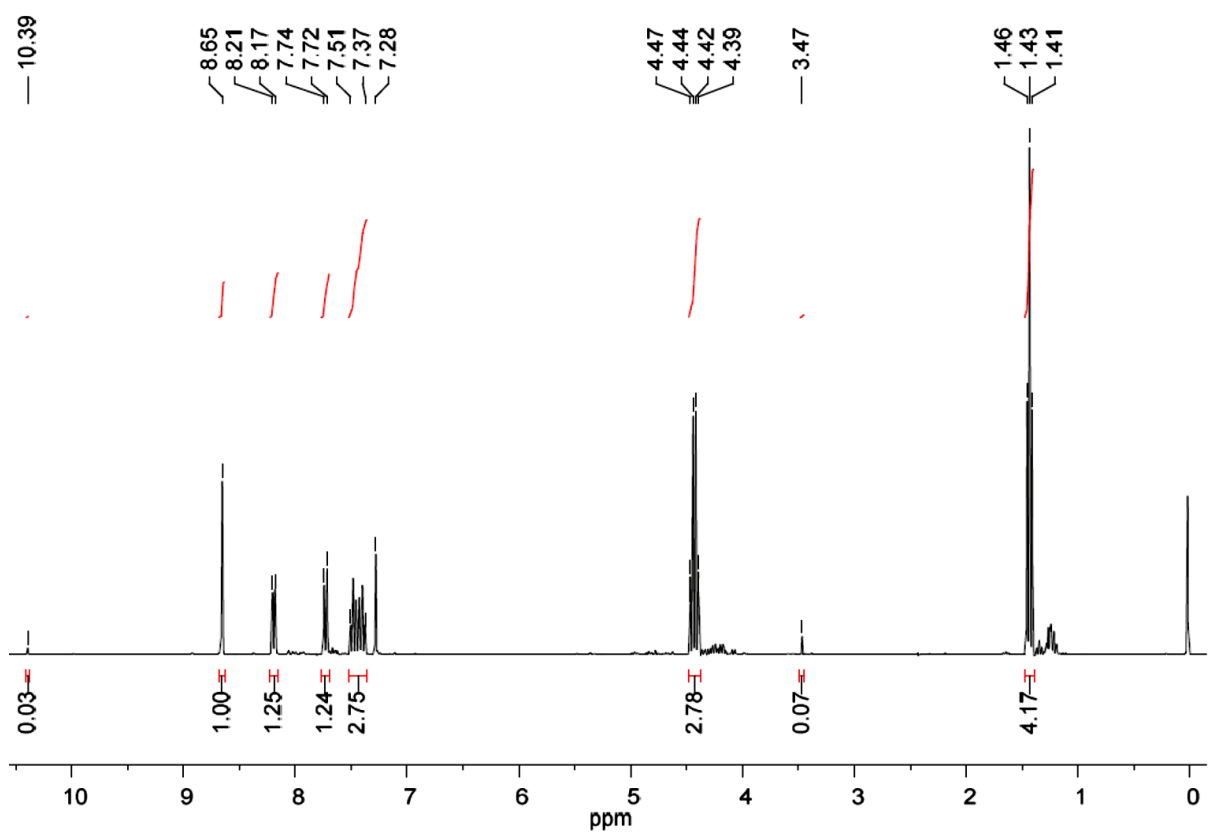

$^1\text{H}$  NMR (300 MHz,  $\text{CDCl}_3$ ) Table 2, Entry 3.

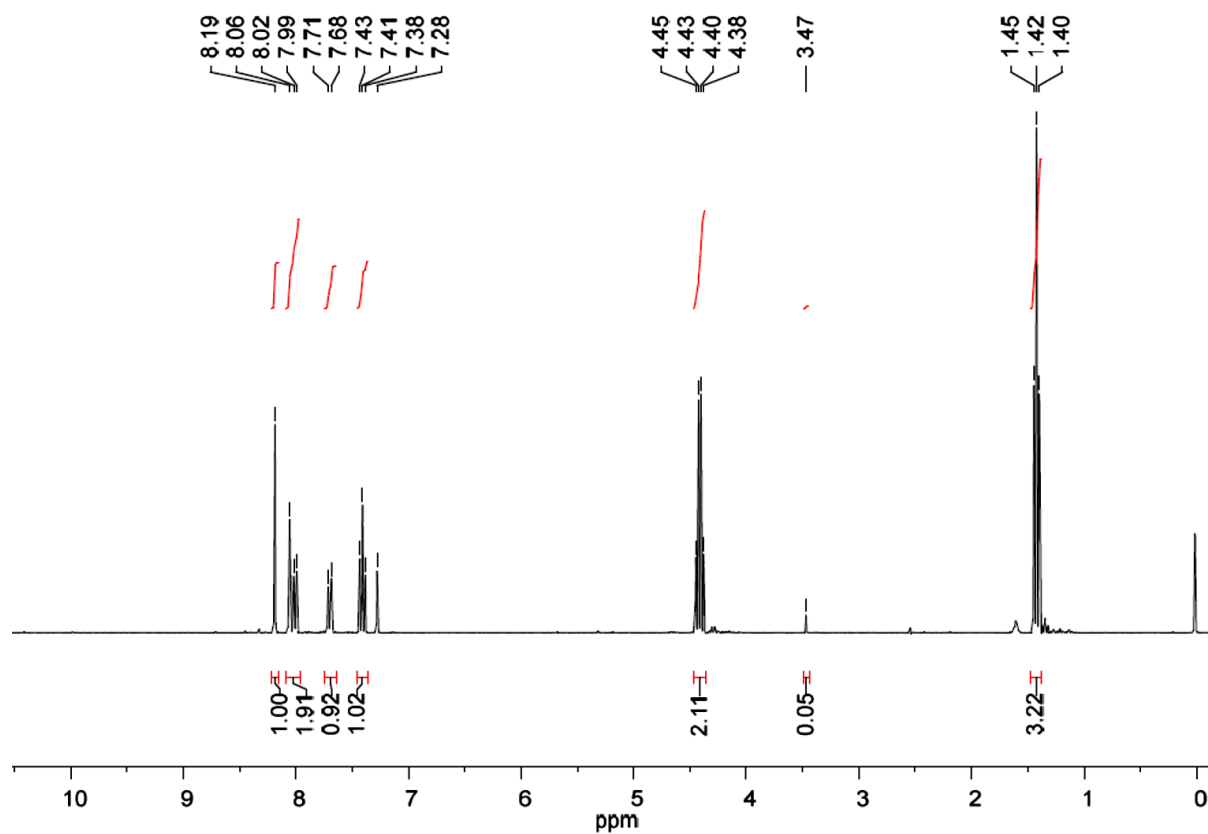

$^1\text{H}$  NMR (300 MHz,  $\text{CDCl}_3$ ) Table 2, Entry 4.

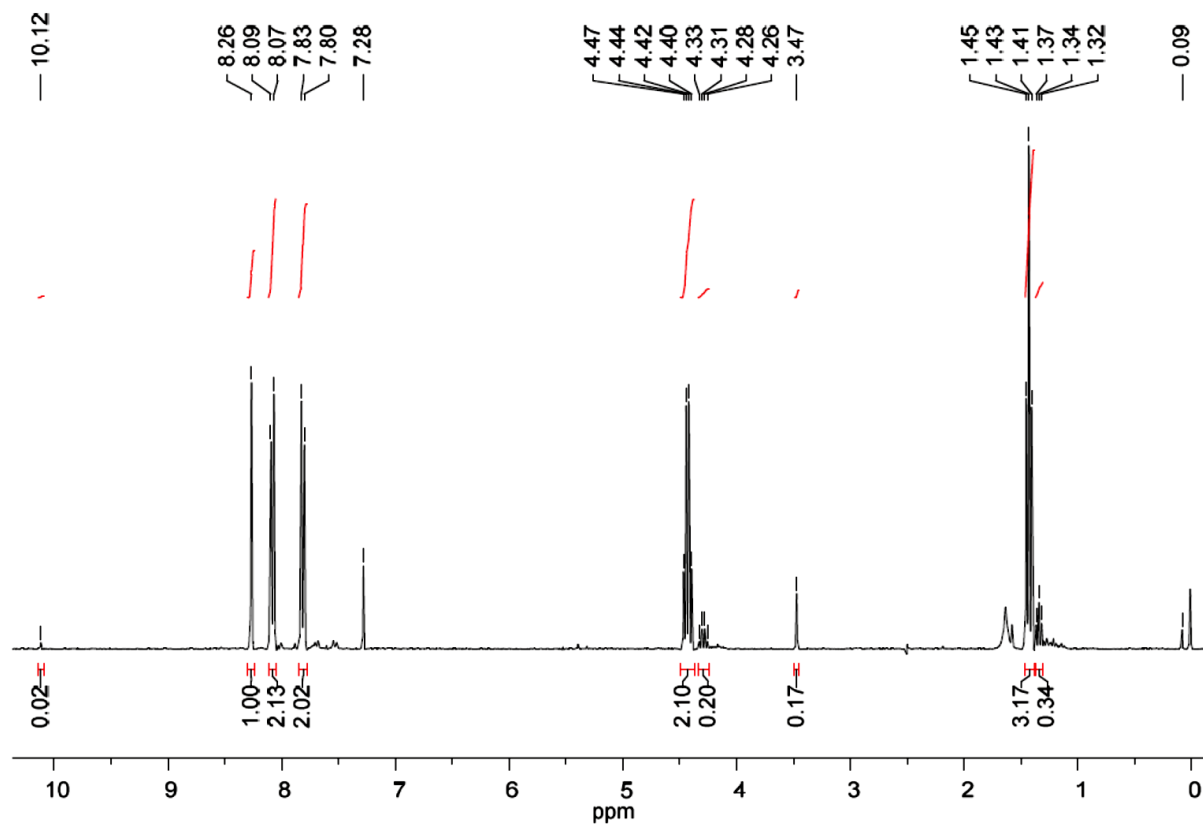

$^1\text{H}$  NMR (300 MHz,  $\text{CDCl}_3$ ) Table 2, Entry 5.

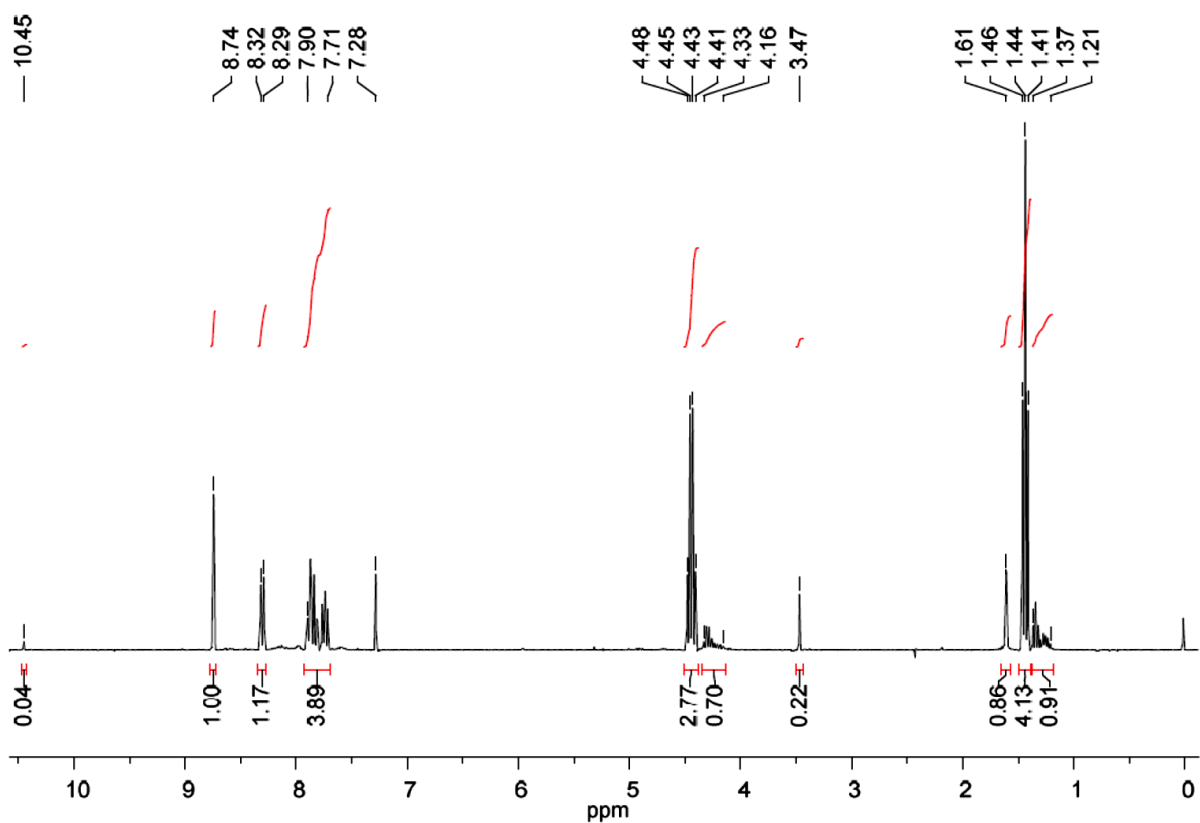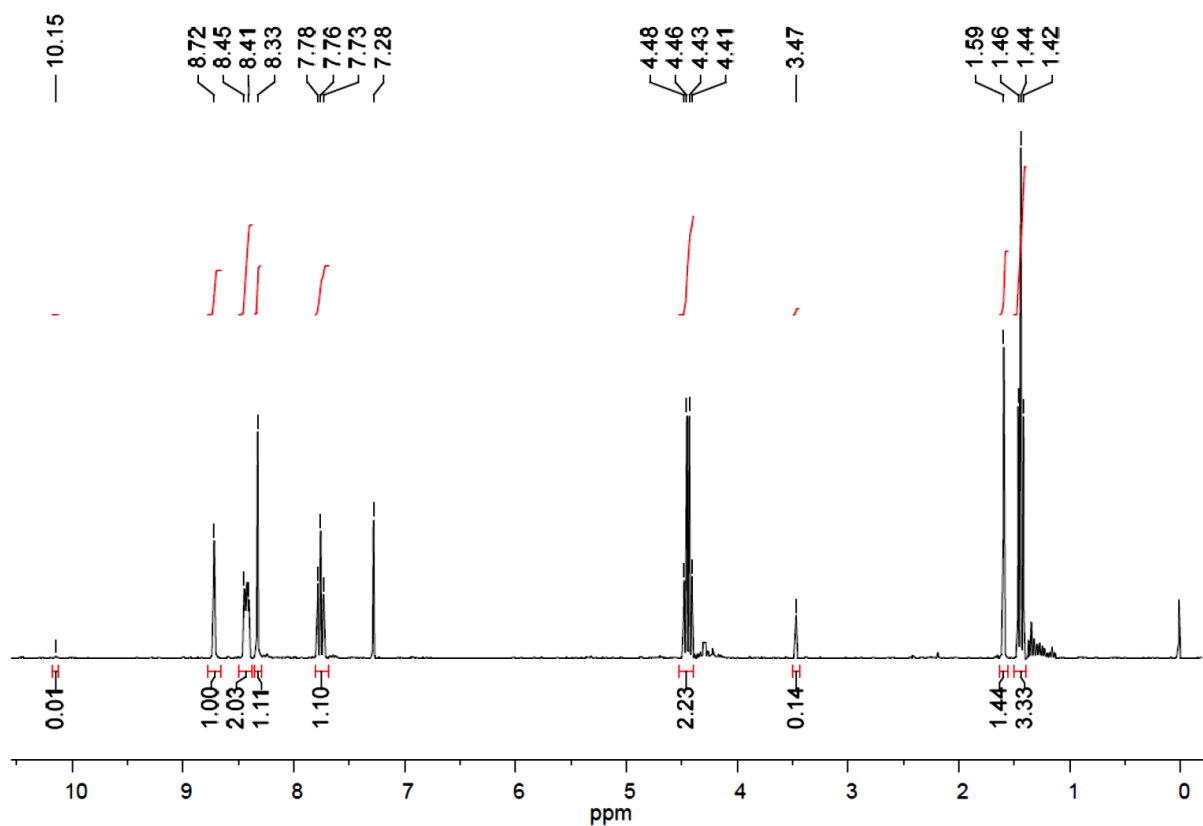

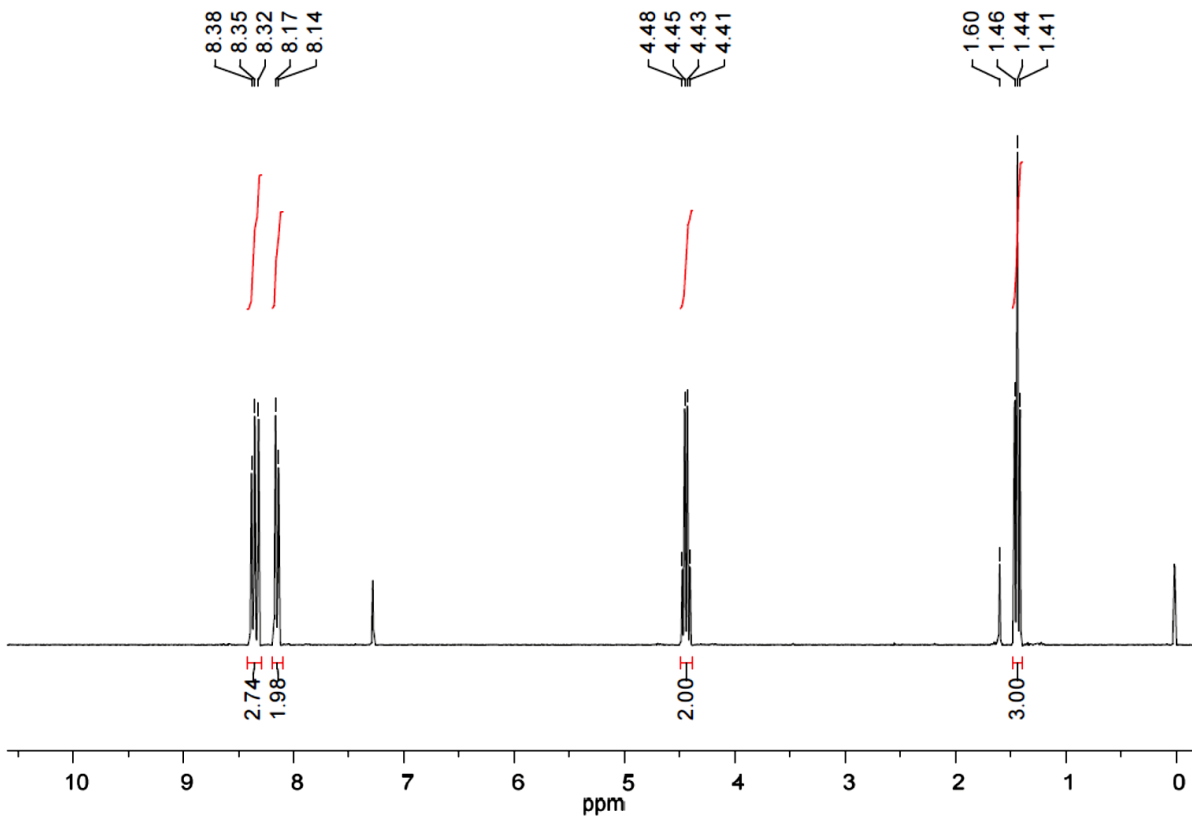

$^1\text{H}$  NMR (300 MHz,  $\text{CDCl}_3$ ) Table 2, Entry 8.

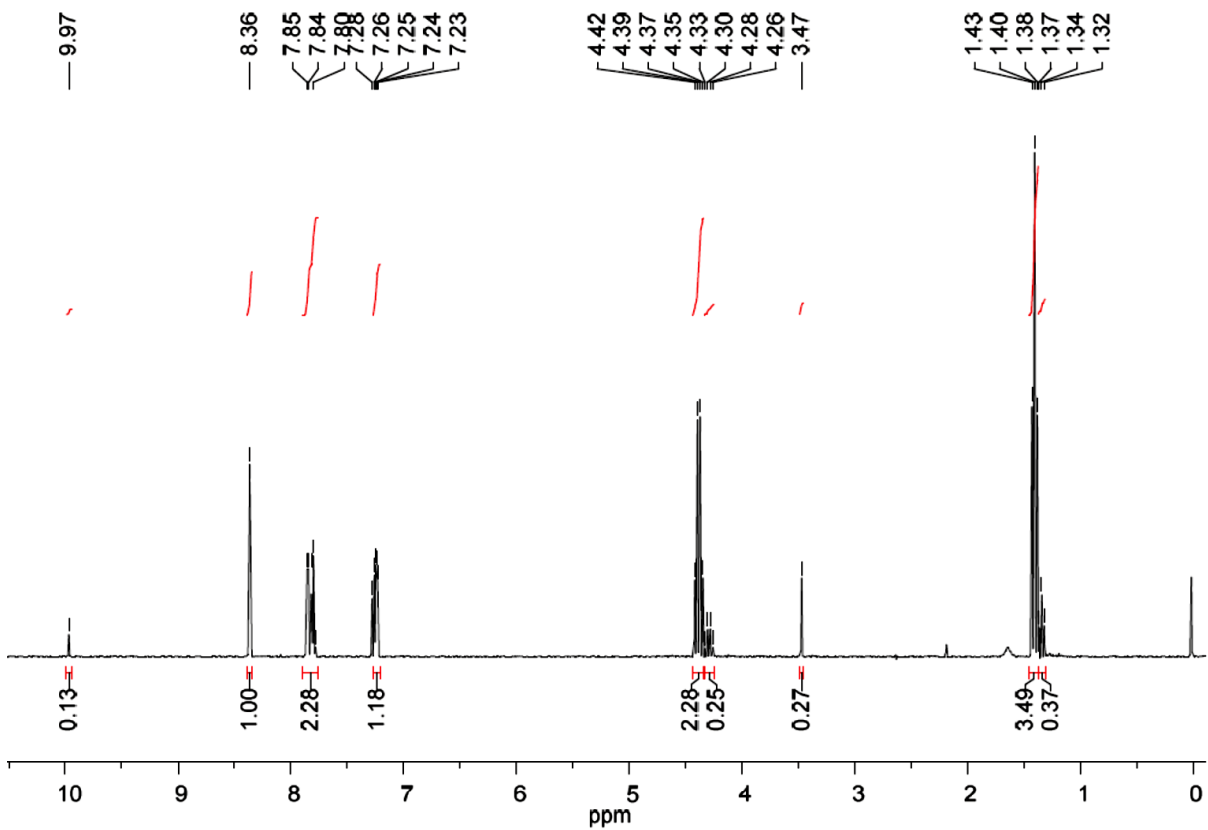

$^1\text{H}$  NMR (300 MHz,  $\text{CDCl}_3$ ) Table 2, Entry 9.

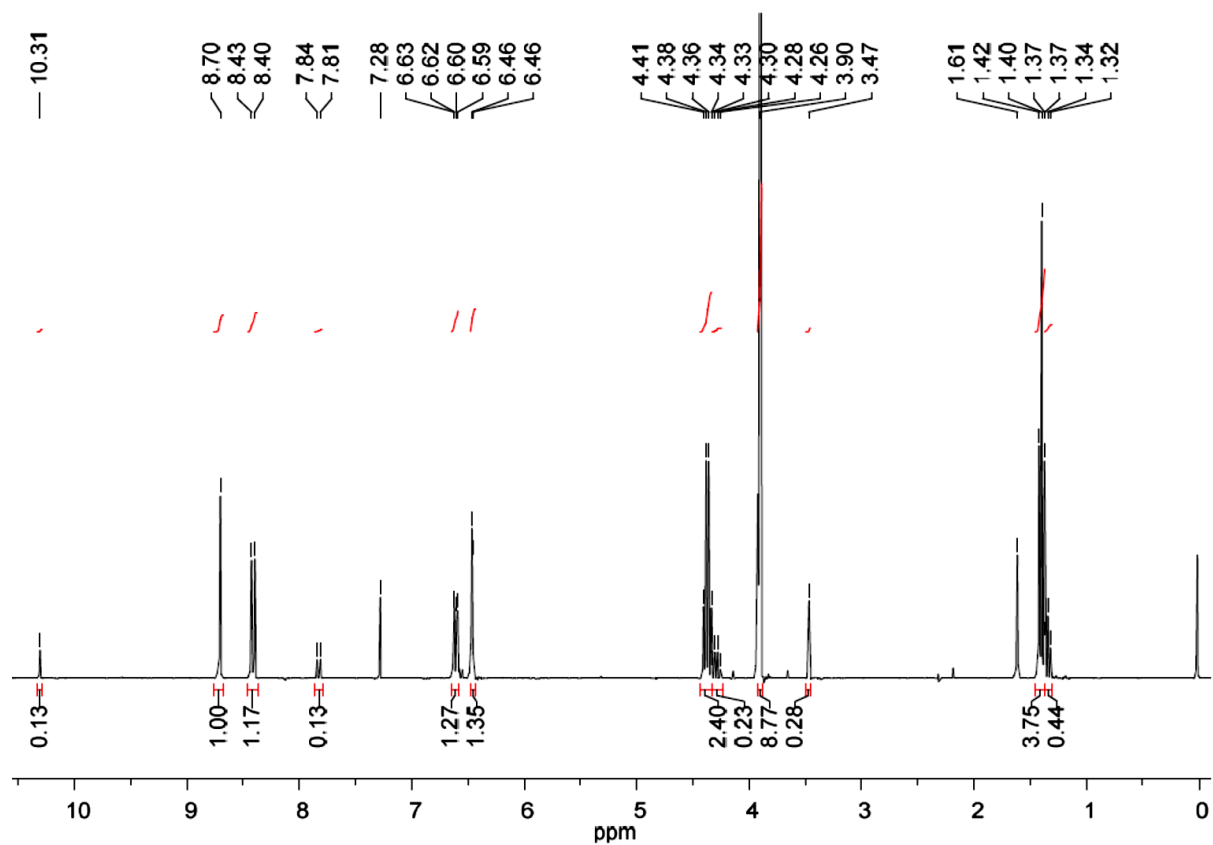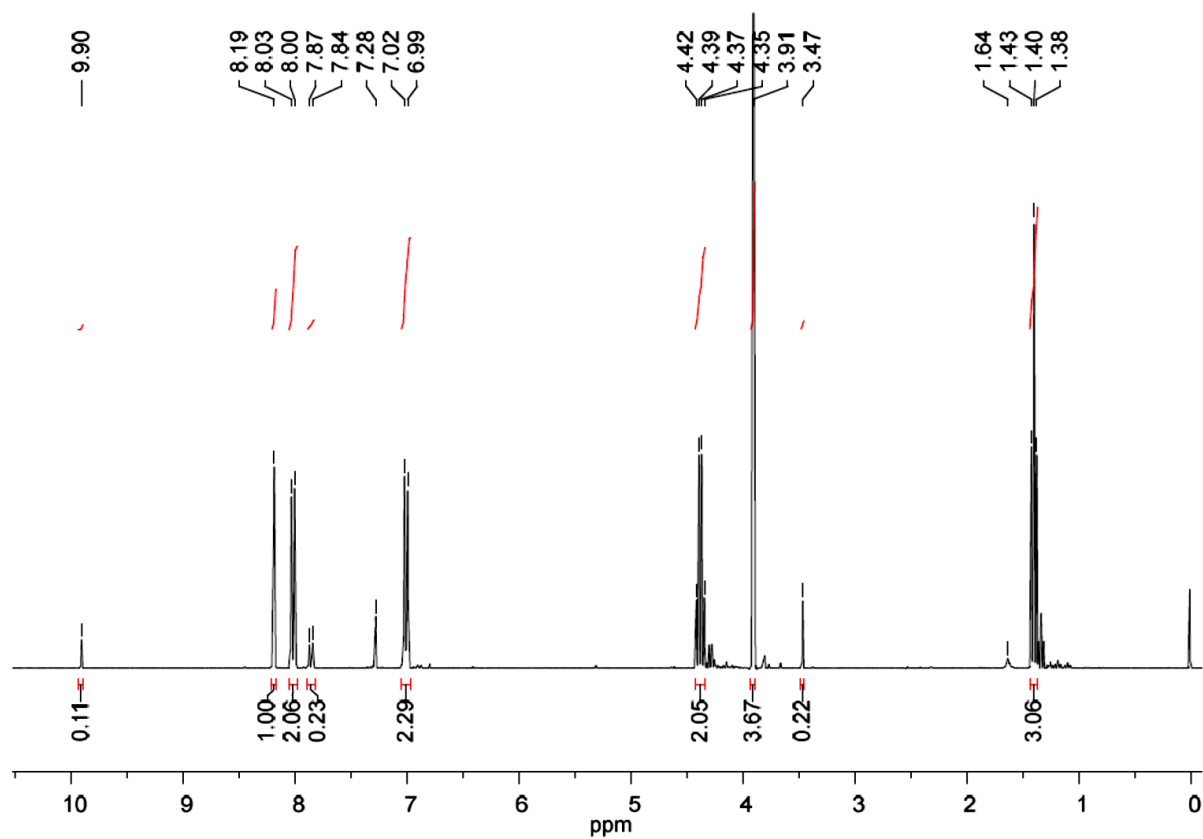

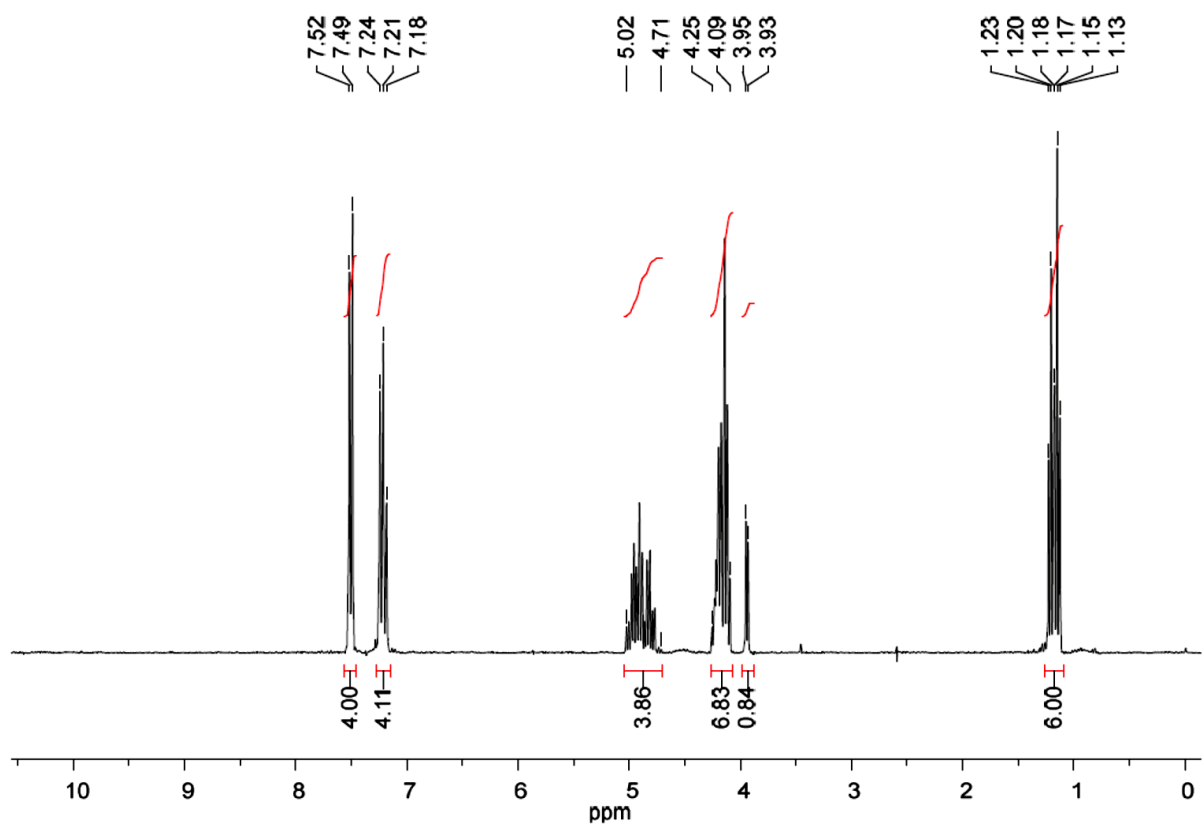

$^1\text{H}$  NMR (300 MHz,  $\text{CDCl}_3$ ) Table 3, Entry 1.

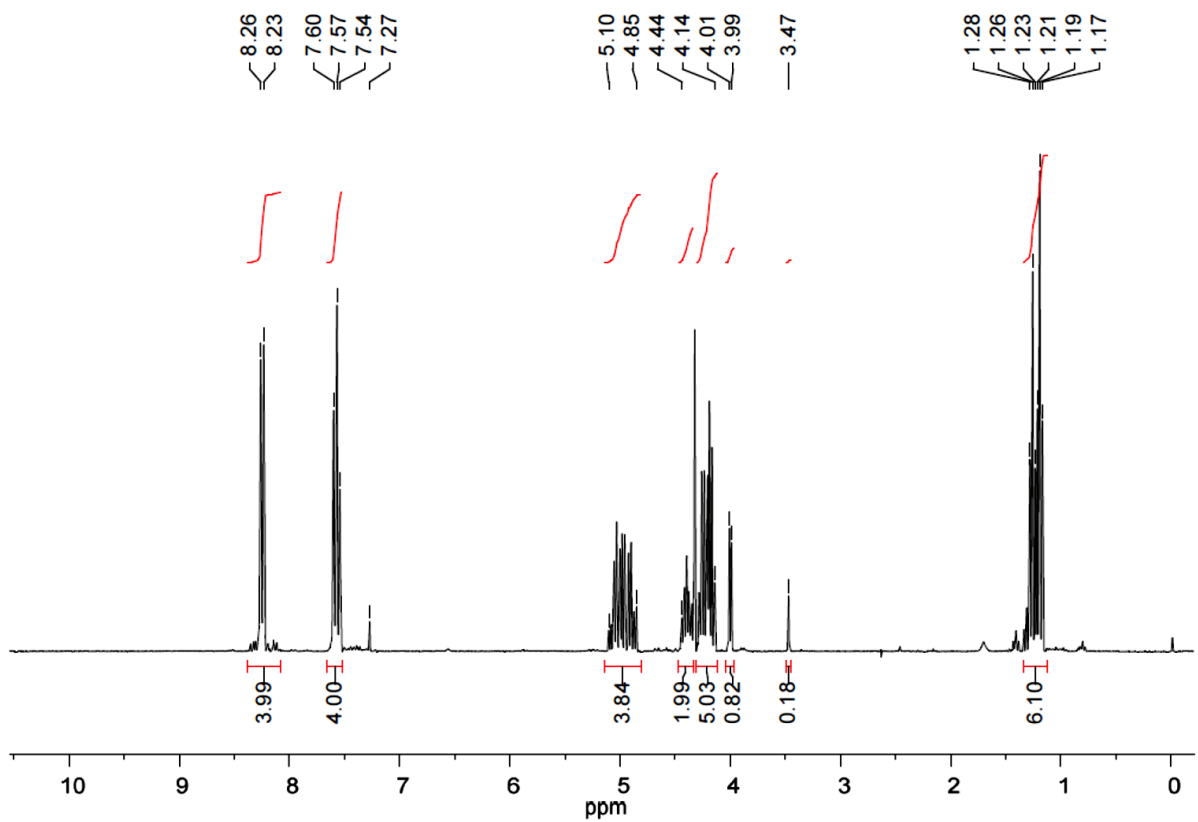

$^1\text{H}$  NMR (300 MHz,  $\text{CDCl}_3$ ) Table 3, Entry 2.



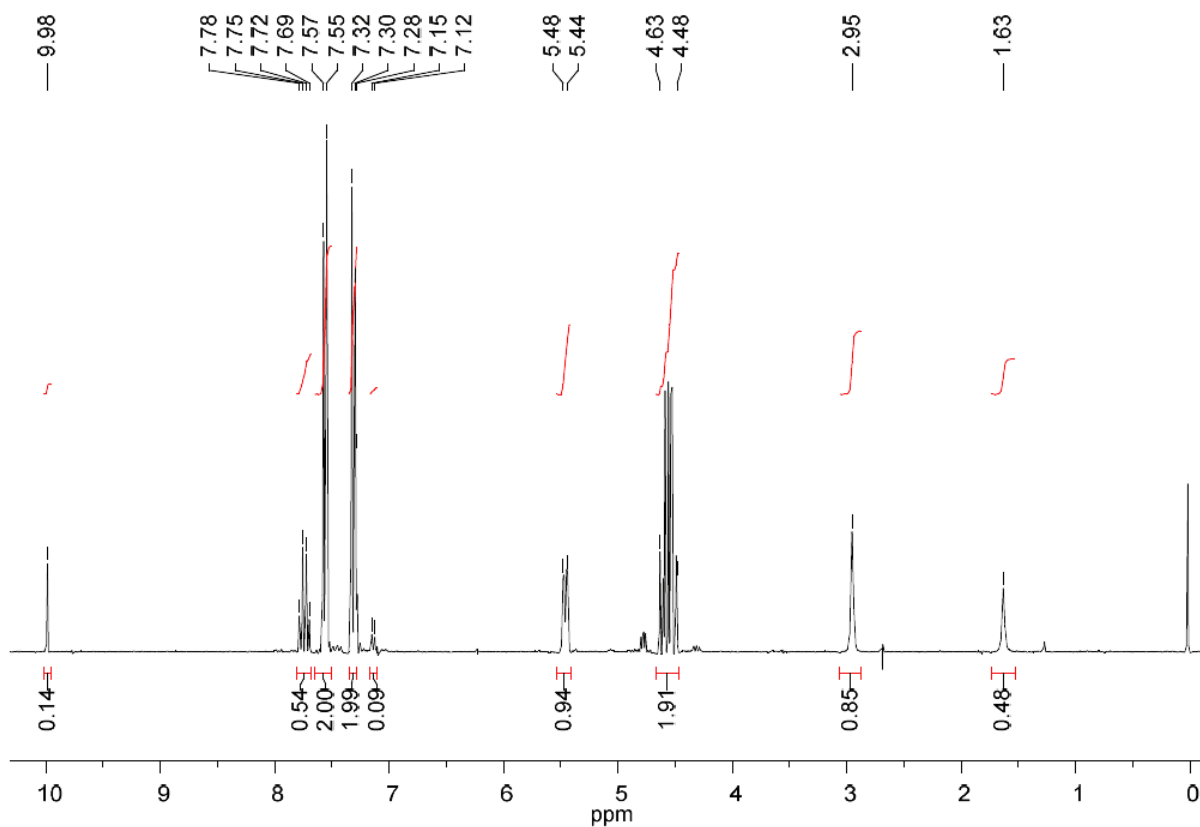

<sup>1</sup>H NMR (300 MHz, CDCl<sub>3</sub>) Table 4, Entry 5.

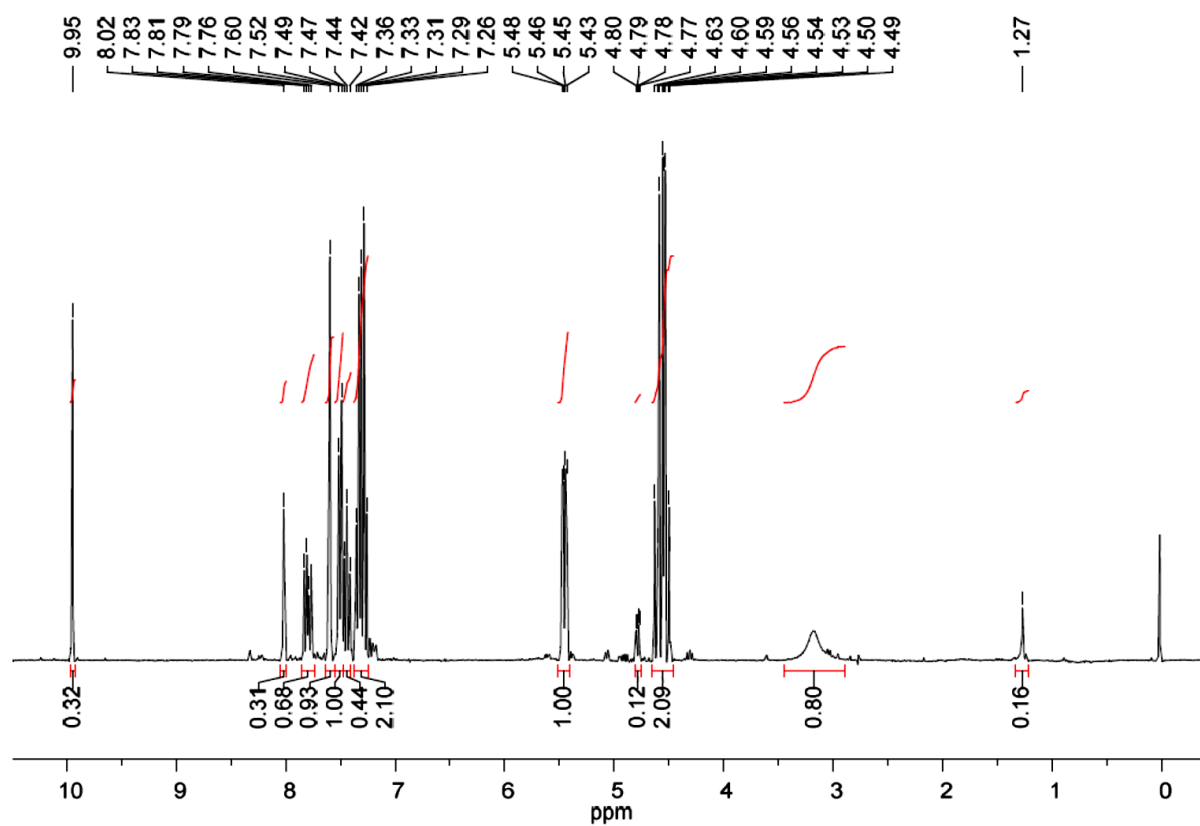

<sup>1</sup>H NMR (300 MHz, CDCl<sub>3</sub>) Table 5, Entry 1.

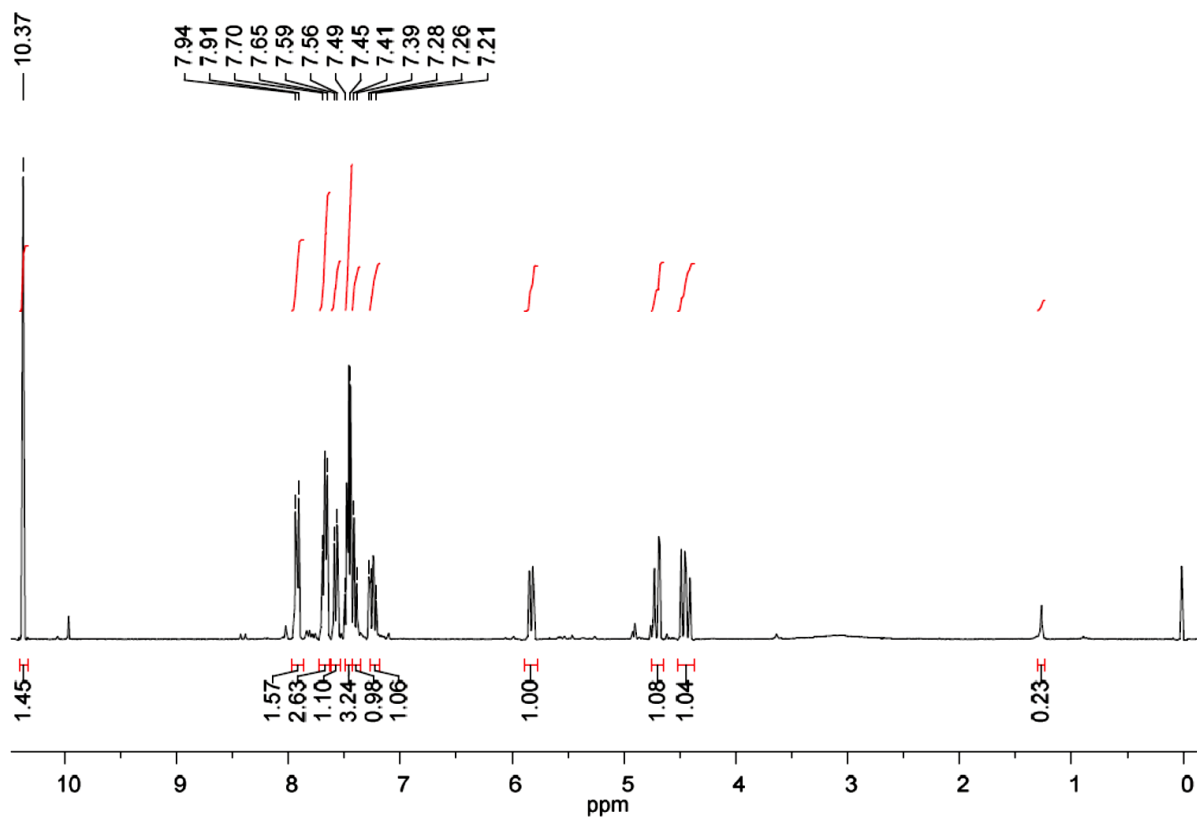

<sup>1</sup>H NMR (300 MHz, CDCl<sub>3</sub>) Table 5, Entry 2.

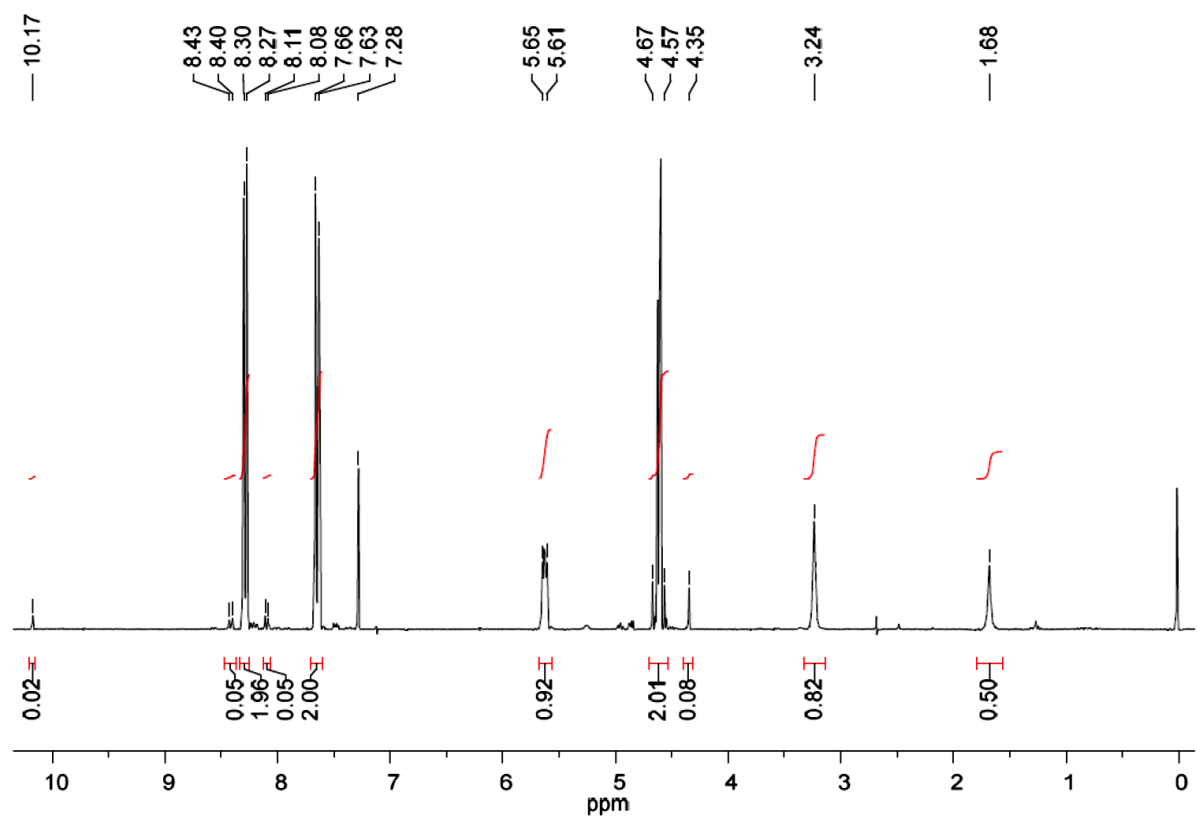

<sup>1</sup>H NMR (300 MHz, CDCl<sub>3</sub>) Table 5, Entry 3.

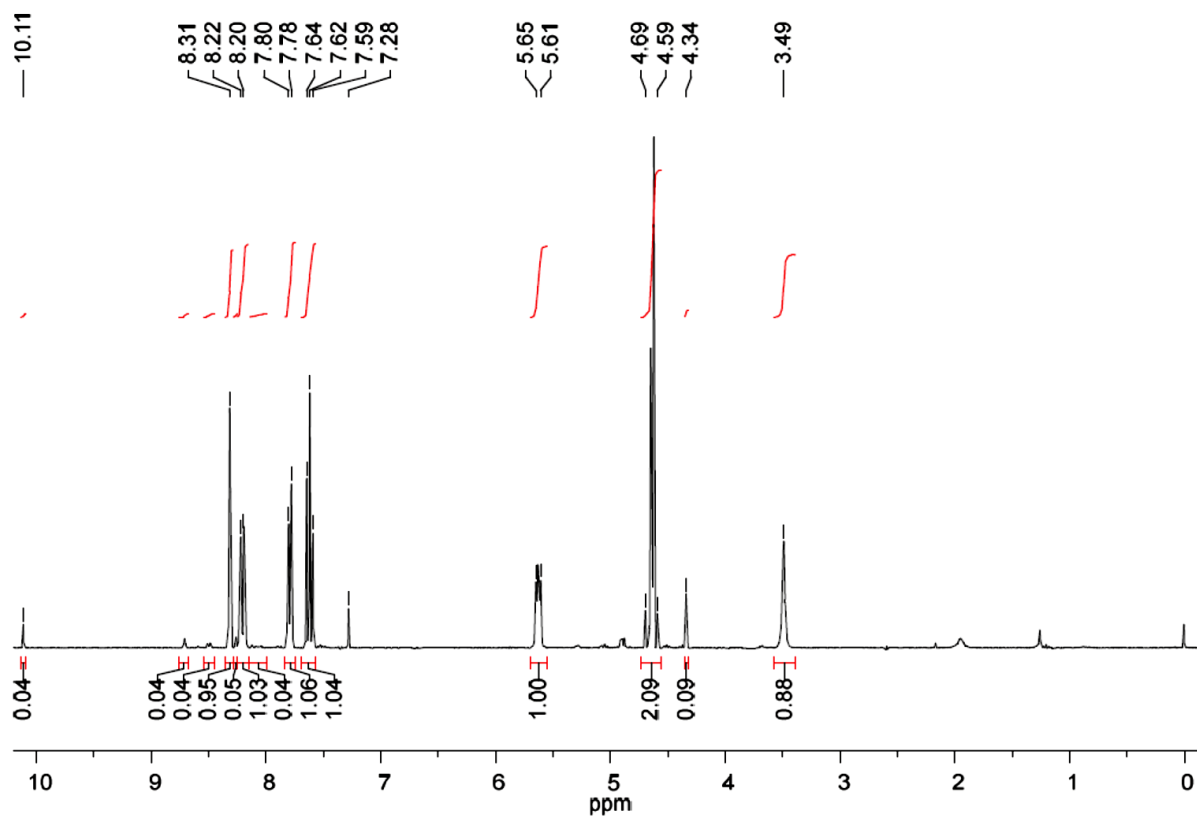

$^{1}\text{H}$  NMR (300 MHz,  $\text{CDCl}_3$ ) Table 5, Entry 4.

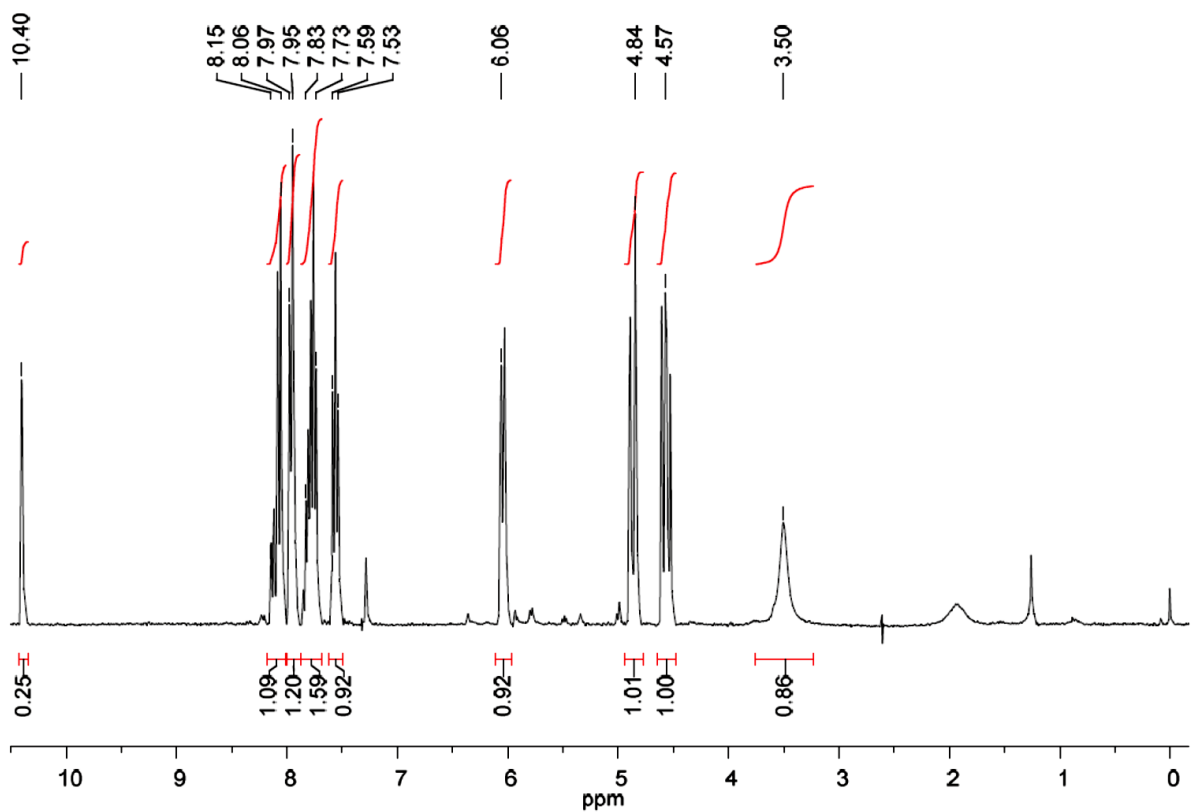

$^{1}\text{H}$  NMR (300 MHz,  $\text{CDCl}_3$ ) Table 5, Entry 5.

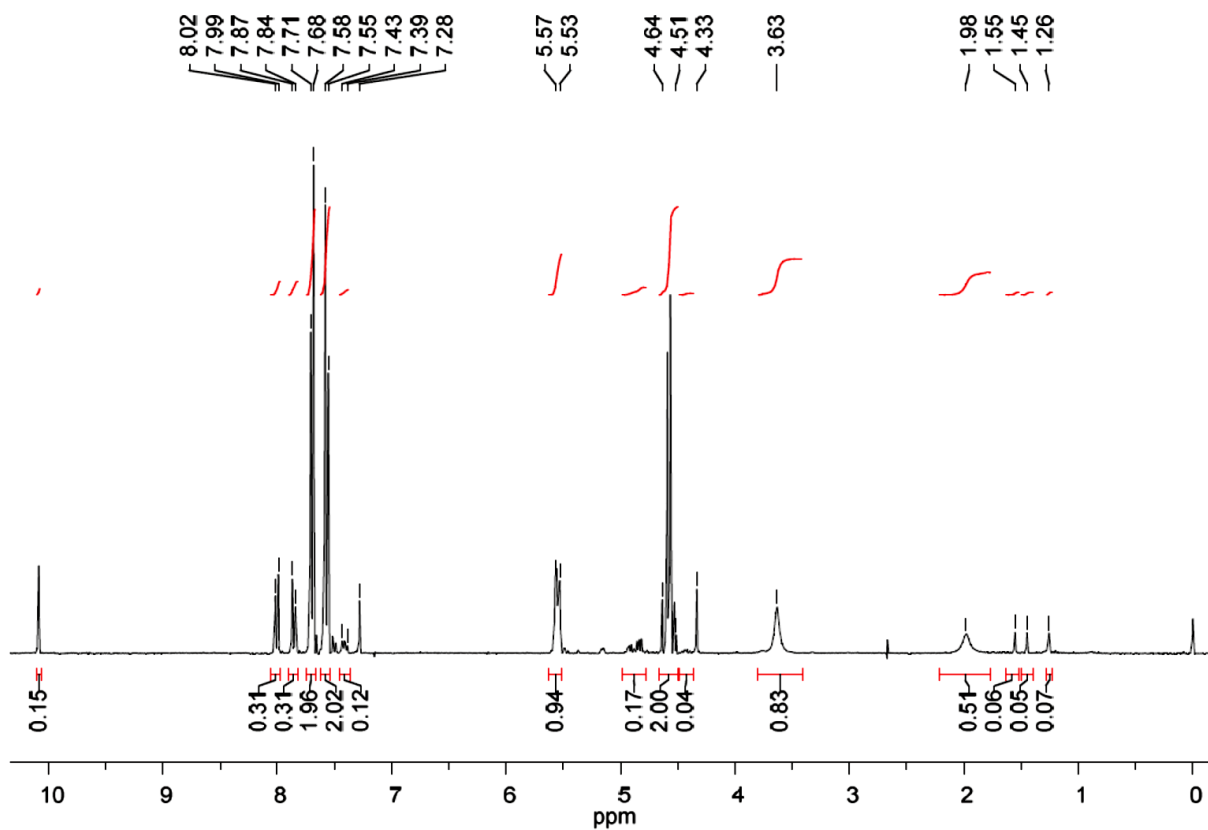

<sup>1</sup>H NMR (300 MHz, CDCl<sub>3</sub>) Table 5, Entry 6.

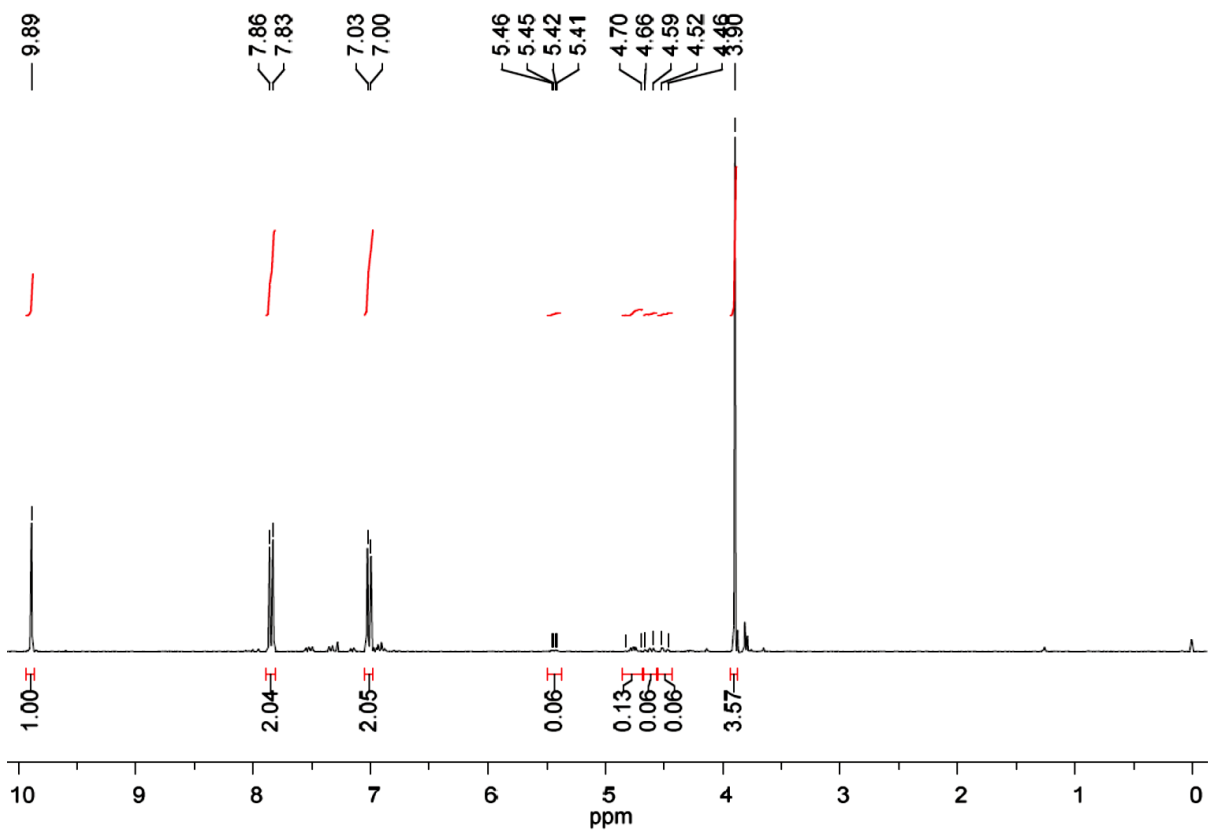

<sup>1</sup>H NMR (300 MHz, CDCl<sub>3</sub>) Table 5, Entry 7.

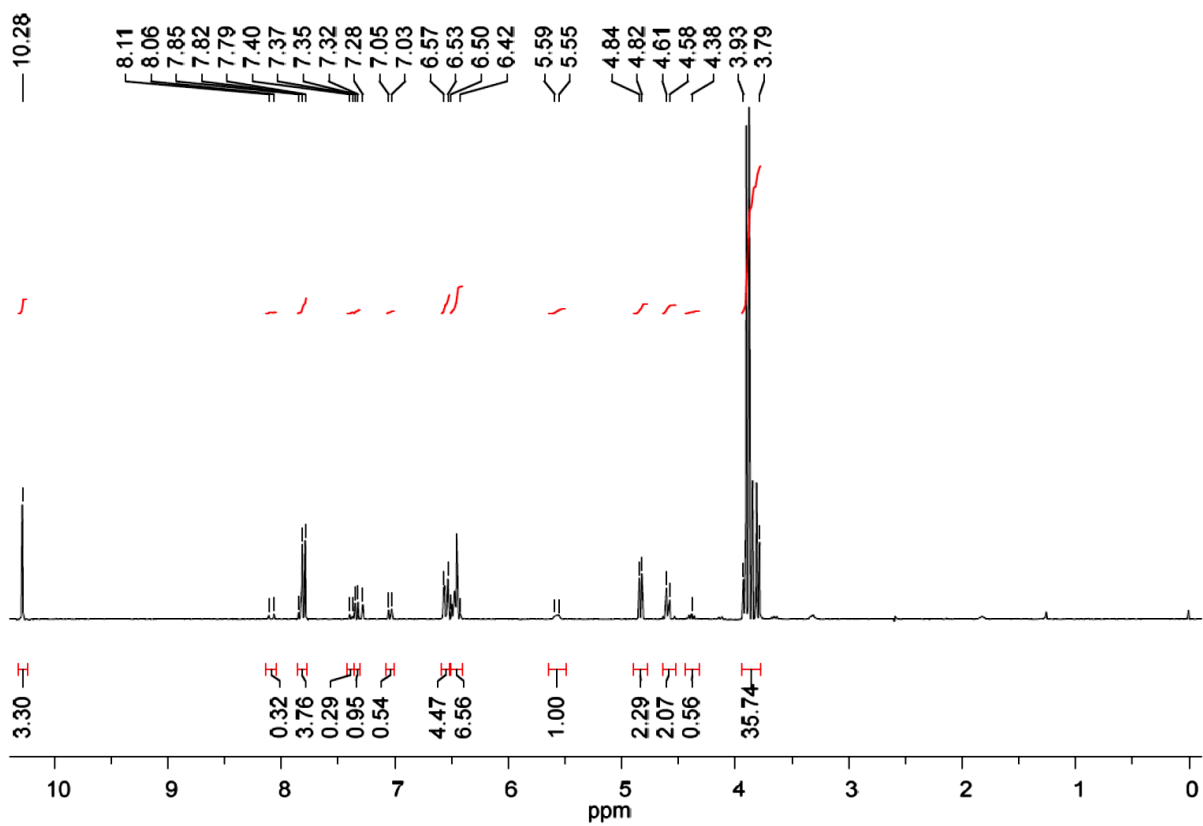

<sup>1</sup>H NMR (300 MHz, CDCl<sub>3</sub>) Table 5, Entry 8.
